# Supplementary material
Source: ML conference proceedings conference paper supplement (https://openreview.net/forum?id=bVkRc9NDHcK)
Supplement: supplementary_material [file attachment]

# APPENDIX

## VARIABLE LENGTH AND VARIABLE QUALITY

## AUDIO STEGANOGRAPHY

**Anonymous authors**

Paper under double-blind review

### A NETWORK ARCHITECTURES

This section details the network architecture design. All convolutional layers here adopt Weight Standardization (Qiao et al., 2019) and Group Normalization (Wu & He, 2018) in order to handle with the small batch size given the limited computational resource. We use ReLU activation function before all convolutional layers.

| Layer       | Concatenate | Resample | Output Shape                             |
|-------------|-------------|----------|------------------------------------------|
| Container   | -           | -        | $c \leftarrow 224 \times 224 \times 3$   |
| Secret      | -           | -        | $s \leftarrow 224 \times 224 \times 2$   |
| Conv        | (c, s)      | -        | $e0 \leftarrow 224 \times 224 \times 5$  |
| Conv        | -           | MaxPool  | $e1 \leftarrow 112 \times 112 \times 64$ |
| Conv        | -           | MaxPool  | $e2 \leftarrow 56 \times 56 \times 128$  |
| Conv        | -           | MaxPool  | $e3 \leftarrow 28 \times 28 \times 256$  |
| Conv        | -           | MaxPool  | $e4 \leftarrow 14 \times 14 \times 512$  |
| Conv        | -           | MaxPool  | $7 \times 7 \times 1024$                 |
| Conv        | (this, e4)  | Upsample | $14 \times 14 \times 512$                |
| Conv        | (this, e3)  | Upsample | $28 \times 28 \times 256$                |
| Conv        | (this, e2)  | Upsample | $56 \times 56 \times 128$                |
| Conv        | (this, e1)  | Upsample | $112 \times 112 \times 64$               |
| Conv        | (this, e0)  | Upsample | $224 \times 224 \times 32$               |
| Conv — Tanh | -           | -        | $224 \times 224 \times 3$                |

Table 1: Encoder Architecture

| Layer       | Concatenate | Resample | Output Shape                             |
|-------------|-------------|----------|------------------------------------------|
| Conv        | -           | -        | $e0 \leftarrow 224 \times 224 \times 3$  |
| Conv        | -           | MaxPool  | $e1 \leftarrow 112 \times 112 \times 64$ |
| Conv        | -           | MaxPool  | $e2 \leftarrow 56 \times 56 \times 128$  |
| Conv        | -           | MaxPool  | $e3 \leftarrow 28 \times 28 \times 256$  |
| Conv        | -           | MaxPool  | $e4 \leftarrow 14 \times 14 \times 512$  |
| Conv        | -           | MaxPool  | $7 \times 7 \times 1024$                 |
| Conv        | (this, e4)  | Upsample | $14 \times 14 \times 512$                |
| Conv        | (this, e3)  | Upsample | $28 \times 28 \times 256$                |
| Conv        | (this, e2)  | Upsample | $56 \times 56 \times 128$                |
| Conv        | (this, e1)  | Upsample | $112 \times 112 \times 64$               |
| Conv        | (this, e0)  | Upsample | $224 \times 224 \times 32$               |
| Conv — Tanh | -           | -        | $224 \times 224 \times 5$                |
| Split       | -           | -        | $224 \times 224 \times (2, 3)$           |

Table 2: Decoder Architecture

**Encoder.** (Table 1). The encoder architecture follows a simple U-Net structure. The container and the secret data has equal spatial resolution, with three channels in the container for RGB and two channels in the secret for the real and imaginary part of the STFT output. They are channel-wise concatenated from the first layer. The Tanh layer at the end normalizes the output to  $(-1, 1)$ .

**Decoder.** (Table 2). The decoder architecture is identical to that of the encoder, except that it does not have to concatenate anything in the input layer, and that the output is split in the channel dimension to represent the updated container and the recovered audio chunk.

**Conditioning.** (Table 2). We insert the FiLM (Perez et al., 2018) layer before every activation function in both the encoder and the decoder. The input to the FiLM layer is the last layer’s feature map and a tensor filled with  $\log_{10} \gamma$  extended to the same spatial dimension.

## REFERENCES

- Ethan Perez, Florian Strub, Harm De Vries, Vincent Dumoulin, and Aaron Courville. Film: Visual reasoning with a general conditioning layer. In *Proceedings of the AAAI Conference on Artificial Intelligence*, volume 32, 2018.
- Siyuan Qiao, Huiyu Wang, Chenxi Liu, Wei Shen, and Alan Yuille. Micro-batch training with batch-channel normalization and weight standardization. *arXiv preprint arXiv:1903.10520*, 2019.
- Yuxin Wu and Kaiming He. Group normalization. In *Proceedings of the European conference on computer vision (ECCV)*, pp. 3–19, 2018.
